# Supplementary material
Source: HighWire-hosted journal article supplement (https://www.jneurosci.org/content/39/37/7428)
Supplement: inline-supplementary-material-9 [file inline-supplementary-material-9.xlsx]

## Sheet: Sheet1
AD/MCI Aβ+ (post-hoc with MMSE) Covariance Matrix		Cross-lagged variables												Covariates
		CSF Aβ	CSF Aβ	CSF Aβ	CSF P-tau	CSF P-tau	CSF P-tau	Aβ dep	Aβ dep	Aβ dep	MMSE	MMSE	MMSE	APOEε4	Sex	bl Age	bl WBA
		bl	24 mo	48 mo	bl	24 mo	48 mo	bl	24 mo	48 mo	bl	24 mo	48 mo
Cross-lagged variables	bl CSF Aβ	12.923
	24 CSF Aβ	12.436	13.489
	48 CSF Aβ	13.095	14.046	16.307
	bl CSF P-tau	-3.957	-3.496	-2.026	238.579
	24 CSF P-tau	-4.032	-2.681	-0.763	231.642	251.527
	48 CSF P-tau	-5.016	-4.199	0.021	229.996	250.689	280.902
	bl Aβ dep	-20.317	-18.612	-22.91	55.527	50.188	41.771	112.519
	24 Aβ dep	-20.566	-19.084	-23.466	55.023	51.507	43.135	102.464	103.561
	48 Aβ dep	-20.518	-19.46	-23.351	54.56	52.881	52.02	92.763	94.333	96.677
	bl MMSE	3.003	2.847	2.884	-10.768	-10.388	-9.904	-10.665	-10.159	-7.761	8.461
	24 MMSE	5.113	4.978	5.118	-21.521	-18.387	-17.155	-21.769	-20.147	-15.149	9.852	19.401
	48 MMSE	7.486	7.095	8.145	-42.471	-40.255	-29.599	-35.908	-34.485	-29.369	11.601	22.73	39.981
Covariates	APOEε4	-0.479	-0.459	-0.481	0.75	0.733	0.76	0.911	0.914	0.908	-0.135	-0.241	-0.384	0.215
	Sex	0.265	0.263	0.26	1.459	1.385	1.292	0.357	0.281	0.25	0.1	0.044	-0.078	0.002	0.247
	bl Age	-3.501	-3.364	-3.529	-0.361	-0.321	-0.206	6.182	6.12	5.43	-2.93	-3.569	-4.18	-0.588	-0.737	54.318
	bl WBA	0.357	0.339	0.372	0.086	0.101	0.144	-1.011	-0.948	-0.794	0.438	0.535	0.628	0.006	0.03	-1.19	0.188
